# Supplementary material for: Speed and accuracy of olfactory discrimination in the rat
Source: Springer Nature journal article supplement (doi:10.1038/nn1142), 2003-10-19

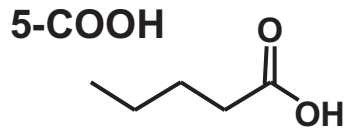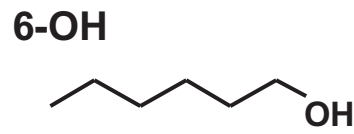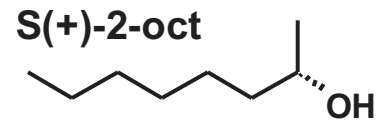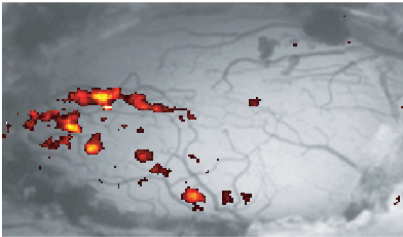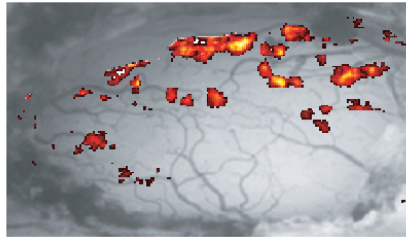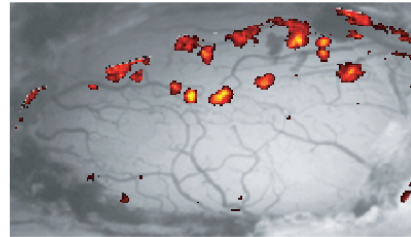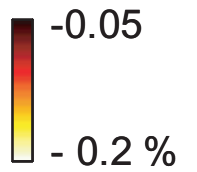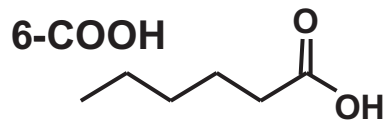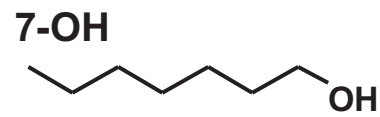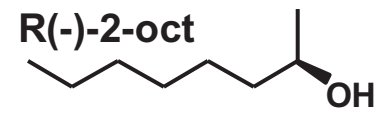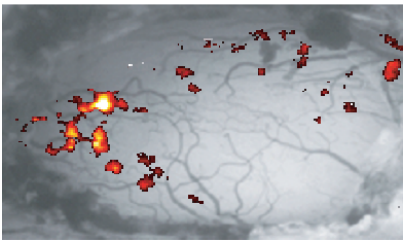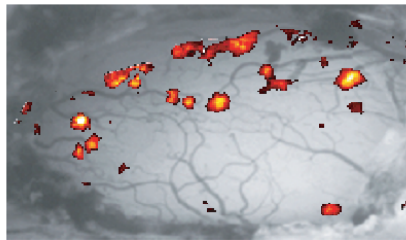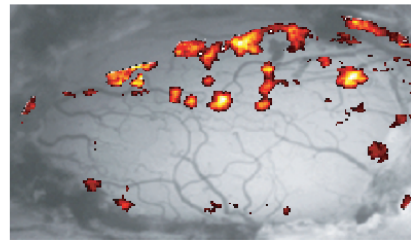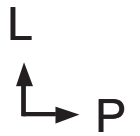

Supplement: 41593_2003_BFnn1142_MOESM1_ESM.pdf [file 41593_2003_BFnn1142_MOESM1_ESM.pdf]
