# Supplementary material for: Speed and accuracy of olfactory discrimination in the rat
Source: Springer Nature journal article supplement (doi:10.1038/nn1142), 2003-10-19
Supplement: 41593_2003_BFnn1142_MOESM2_ESM.pdf [file 41593_2003_BFnn1142_MOESM2_ESM.pdf]

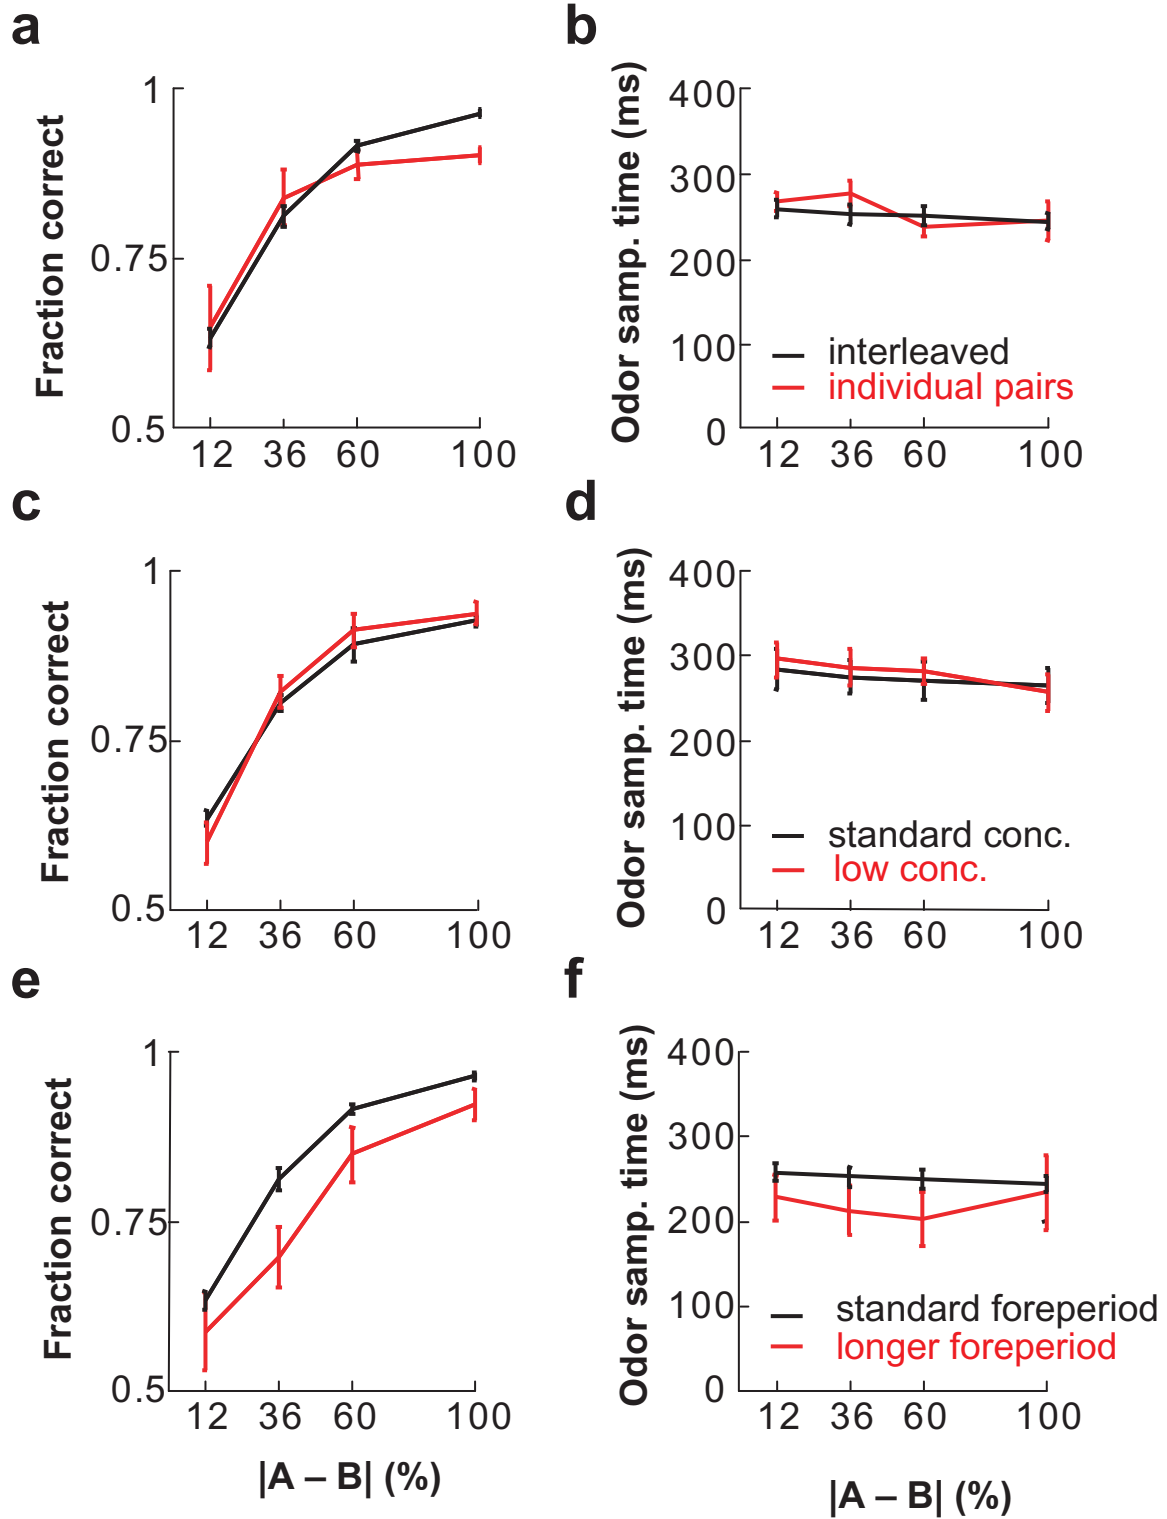

Uchida and Mainen, Supplementary Figure 2
